# Supplementary material for: The gut microbiota mediates the protective effects of anserine supplementation on hyperuricaemia and associated renal inflammation
Source: Royal Society of Chemistry journal article supplement (doi:10.1039/d1fo01884a), 2021-01-01
Supplement: d1fo01884a1.pdf [file d1fo01884a1.pdf]

**The gut microbiota mediates the protective effects of anserine supplementation on hyperuricaemia and associated renal inflammation**

Jiaojiao Han<sup>a,b</sup>, Ziyang Wang<sup>a,b</sup>, Chenyang Lu<sup>a,b</sup>, Jun Zhou<sup>a,b</sup>, Ye Li<sup>a,b</sup>, Tinghong Ming<sup>a,b</sup>, Zhen Zhang<sup>a,b</sup>, Zaijie Jim Wang<sup>c</sup>, Xiurong Su<sup>\*a,b</sup>

<sup>a</sup> State Key Laboratory for Managing Biotic and Chemical Threats to the Quality and Safety of Agro-products, Ningbo University, Ningbo, China

<sup>b</sup> School of Marine Science, Ningbo University, Ningbo, China

<sup>c</sup> Department of Biopharmaceutical Sciences, University of Illinois, Chicago, USA

\* Corresponding author

Dr. Xiurong Su

School of Marine Science, Ningbo University, 818 Fenghua Road, Ningbo, China

Tel/Fax: +86 574 87608368

E-mail address: hanjiaojiao@nbu.edu.cn

## Table Legends

**Table S1.** Sequences of the primers used for qRT-PCR analysis.

| Gene           | Forward primer            | Reverse primer           |
|----------------|---------------------------|--------------------------|
| $\beta$ -actin | CAGGCATTGCTGACAGGATG      | TGCTGATCCACATCTGCTGG     |
| XOD            | TATGCATCCAAGGCTGTCGG      | GATCCACACAAGCGTTTCGG     |
| ADA            | CATGCGGTTGTTGCTTCAA       | CTGCGTTGATGTTCAAGTCGC    |
| PNP            | AGGCCCCAACTTTGAGACTG      | ACAGTGCCTTGCGACGATAA     |
| ABCG2          | TTCTGGTGGAGAGAAACGCC      | TCTGGGGCCACAACGTAGTA     |
| MRP4           | TCAGCAACTCGTCTTCCCAC      | GGCCAGTGCAGATACATGGT     |
| GLUT9          | GTCGGCATGGGTTTCCAGTA      | GGAAGGCAGCTGAGATCTGG     |
| URAT1          | ACACAGCCAGTCTCTTGATGGAGTG | CCGTGATGAGCCAGCGTGCC     |
| UMOD           | TAGCAGAACATGCATTGAGCCT    | TGTGCTGGGCATTACATGGT     |
| NLRP3          | CAGACCTCCAAGACCACGACTG    | CATCCGCAGCCAATGAACAGAG   |
| Caspase-1      | TCCAATAATGCAAGTCAAGCC     | GCTGTACCCCAGATTTTGTAGCA  |
| ASC            | GTGCTTAGAGACATGGGCTTAC    | GTTCTGGCTGTACTCTGAGCA    |
| TLR4           | GGACTATGTGATGTGACCATTGAT  | TTATAGATACACCTGCCAGAGACA |
| MyD88          | CTACAGAGCAAGGAATGTGACT    | ACCTGATGCCATTTGCTGTCC    |
| TRAF6          | ATCACTTGGCACGACACTTG      | TAGGCGACTCTCCAACGTGT     |
| NF- $\kappa$ B | GTCCTCCGTGAGCTGCTG        | GGGATGGCCTCAAGAAGGAG     |
| ZO-1           | AGTGAACACGAGACGCTGG       | AGACGATCAACCGCATTGG      |
| Occludin       | GCTGTGATGTGTGTGAGCTG      | GACGG TCTACCT GGAGGAAC   |
| Claudin-1      | TCAGGTCTGGCGACATTAGT      | GACAGGAGCAGGAAAGTAGGA    |

**Table S2.** RDP classifications of the sequence reads at the class and genus levels in hyperuricaemic mice. The data are expressed as the mean  $\pm$  SD, n=8. In a, b and c, significant differences ( $P<0.05$ ) were determined by ANOVA.

| Class               | control            | model              | ans                | Genus                    | control            | model              | ans                |
|---------------------|--------------------|--------------------|--------------------|--------------------------|--------------------|--------------------|--------------------|
| Bacteroidia         | 45.35 $\pm$ 4.29%a | 43.92 $\pm$ 2.05%a | 42.25 $\pm$ 2.13%a | <i>Lactobacillus</i>     | 35.70 $\pm$ 1.04%b | 24.4 $\pm$ 1.89%c  | 45.89 $\pm$ 3.87%a |
| Bacilli             | 26.06 $\pm$ 1.89%b | 37.35 $\pm$ 4.04%a | 40.05 $\pm$ 2.29%a | <i>Porphyromonas</i>     | 17.65 $\pm$ 3.9%b  | 28.01 $\pm$ 2.34%a | 15.25 $\pm$ 3.1%b  |
| Clostridia          | 20.78 $\pm$ 3.57%a | 10.04 $\pm$ 2.62%b | 14.06 $\pm$ 1.62%a | <i>Lachnospira</i>       | 19.35 $\pm$ 3.6%a  | 18.74 $\pm$ 3.44%a | 16.06 $\pm$ 2.03%b |
| Gammaproteobacteria | 2.28 $\pm$ 0.44%a  | 1.60 $\pm$ 0.82%a  | 0.62 $\pm$ 0.23%b  | <i>Pseudomonas</i>       | 2.16 $\pm$ 0.42%a  | 2.66 $\pm$ 1.09%a  | 0.40 $\pm$ 0.28%b  |
| Actinobacteria      | 2.74 $\pm$ 0.85%a  | 2.41 $\pm$ 1.22%a  | 0.92 $\pm$ 0.22%b  | <i>Coriobacteriaceae</i> | 1.96 $\pm$ 0.65%a  | 1.18 $\pm$ 0.11%b  | 0.60 $\pm$ 0.12%c  |
| Alphaproteobacteria | 0.11 $\pm$ 0.04%a  | 0.57 $\pm$ 0.96%a  | 0.13 $\pm$ 0.08%a  | <i>Brevundimonas</i>     | 0.04 $\pm$ 0.01%b  | 0.09 $\pm$ 0.06%a  | 0.06 $\pm$ 0.03%a  |
| Erysipelotrichia    | 0.34 $\pm$ 0.12%a  | 0.34 $\pm$ 0.13%a  | 0.16 $\pm$ 0.08%b  | <i>Bacteroides</i>       | 2.78 $\pm$ 1.31%a  | 2.16 $\pm$ 1.19%a  | 0.99 $\pm$ 0.49%b  |
| Saccharibacteria    | 0.63 $\pm$ 0.42%b  | 2.18 $\pm$ 0.23%a  | 1.18 $\pm$ 0.61%b  | <i>Clostridium</i>       | 10.24 $\pm$ 0.92%a | 3.24 $\pm$ 0.66%b  | 4.00 $\pm$ 3.13%b  |
| others              | 1.75 $\pm$ 0.52%   | 1.61 $\pm$ 0.64%   | 0.78 $\pm$ 0.70%   | <i>Barnesiella</i>       | 3.70 $\pm$ 1.38%c  | 5.49 $\pm$ 0.38%b  | 6.99 $\pm$ 1.10%a  |
|                     |                    |                    |                    | <i>Saccharibacteria</i>  | 0.48 $\pm$ 0.13%c  | 2.10 $\pm$ 0.35%a  | 1.01 $\pm$ 0.57%b  |
|                     |                    |                    |                    | <i>Alloprevotella</i>    | 0.64 $\pm$ 0.28%b  | 2.50 $\pm$ 0.55%a  | 3.25 $\pm$ 1.01%a  |
|                     |                    |                    |                    | <i>others</i>            | 5.31 $\pm$ 1.03%   | 9.44 $\pm$ 1.34%   | 5.5 $\pm$ 0.89%    |

**Table S3.** RDP classifications of the sequence reads at the class and genus levels in microbiota transplantation mice. The data are

expressed as the mean  $\pm$  SD, n=8. In a, b and c, significant differences ( $P<0.05$ ) were determined by ANOVA among the MT-control, MT-model and MT-ans groups. In A, B and C, significant differences ( $P<0.05$ ) were determined by ANOVA among the A-MT-control, A-MT-model and A-MT-ans groups.

| Class                    | MT-control         | MT-model           | MT-ans             | A-MT-control       | A-MT-model         | A-MT-ans           |
|--------------------------|--------------------|--------------------|--------------------|--------------------|--------------------|--------------------|
| Bacilli                  | 42.46 $\pm$ 3.08%b | 65.01 $\pm$ 2.65%a | 41.36 $\pm$ 0.87%b | 46.67 $\pm$ 7.67%B | 68.59 $\pm$ 2.81%A | 38.05 $\pm$ 2.59%B |
| Bacteroidia              | 32.23 $\pm$ 3.58%a | 10.57 $\pm$ 1.72%b | 31.33 $\pm$ 2.00%a | 25.41 $\pm$ 3.30%B | 16.72 $\pm$ 2.28%C | 34.31 $\pm$ 1.30%A |
| Clostridia               | 15.22 $\pm$ 3.30%a | 6.51 $\pm$ 1.74%b  | 20.21 $\pm$ 3.16%a | 20.12 $\pm$ 4.86%A | 6.57 $\pm$ 1.86%B  | 20.76 $\pm$ 2.77%A |
| Actinobacteria           | 2.28 $\pm$ 0.34%c  | 6.65 $\pm$ 2.08%a  | 3.45 $\pm$ 1.46%b  | 2.08 $\pm$ 0.41%A  | 2.38 $\pm$ 0.86%A  | 2.15 $\pm$ 1.28%A  |
| Gammaproteobacteria      | 1.46 $\pm$ 0.62%b  | 5.66 $\pm$ 0.73%a  | 0.51 $\pm$ 0.23%c  | 0.80 $\pm$ 0.27%B  | 0.85 $\pm$ 0.15%B  | 1.38 $\pm$ 0.26%A  |
| others                   | 6.33 $\pm$ 1.84%   | 5.58 $\pm$ 1.58%   | 3.15 $\pm$ 1.94%   | 4.93 $\pm$ 1.41%   | 4.89 $\pm$ 2.60%   | 3.34 $\pm$ 2.10%   |
| Genus                    | MT-control         | MT-model           | MT-ans             | A-MT-control       | A-MT-model         | A-MT-ans           |
| <i>Lactobacillus</i>     | 66.37 $\pm$ 3.12%a | 42.86 $\pm$ 3.42%b | 61.70 $\pm$ 1.65%a | 63.88 $\pm$ 2.39%A | 48.40 $\pm$ 2.09%B | 66.24 $\pm$ 3.73%A |
| <i>Porphyromonas</i>     | 1.87 $\pm$ 1.18%b  | 17.69 $\pm$ 1.86%a | 5.85 $\pm$ 1.57%b  | 3.62 $\pm$ 1.35%B  | 14.08 $\pm$ 2.33%A | 3.63 $\pm$ 1.77%B  |
| <i>Lachnospira</i>       | 5.58 $\pm$ 1.60%a  | 3.66 $\pm$ 0.33%b  | 5.55 $\pm$ 0.50%a  | 8.32 $\pm$ 0.94%C  | 12.67 $\pm$ 1.42%B | 14.46 $\pm$ 1.42%A |
| <i>Bacteroides</i>       | 12.88 $\pm$ 1.07%a | 2.89 $\pm$ 0.55%b  | 2.92 $\pm$ 0.37%b  | 6.82 $\pm$ 0.56%A  | 3.33 $\pm$ 0.77%B  | 1.76 $\pm$ 0.52%B  |
| <i>Alistipes</i>         | 1.08 $\pm$ 0.48%c  | 13.45 $\pm$ 1.30%a | 2.49 $\pm$ 0.21%b  | 5.89 $\pm$ 1.57%A  | 2.68 $\pm$ 0.26%B  | 0.89 $\pm$ 0.49%C  |
| <i>Barnesiella</i>       | 1.75 $\pm$ 0.98%b  | 2.34 $\pm$ 0.62%b  | 3.90 $\pm$ 0.84%a  | 1.43 $\pm$ 0.26%B  | 4.94 $\pm$ 1.04%A  | 0.50 $\pm$ 0.18%C  |
| <i>Parabacteroides</i>   | 2.05 $\pm$ 0.59%a  | 1.68 $\pm$ 0.55%a  | 1.41 $\pm$ 0.42%b  | 1.43 $\pm$ 0.23%A  | 1.42 $\pm$ 0.26%A  | 0.59 $\pm$ 0.20%B  |
| <i>Coriobacteriaceae</i> | 1.58 $\pm$ 0.18%c  | 3.53 $\pm$ 0.61%b  | 4.26 $\pm$ 0.31%a  | 1.50 $\pm$ 0.18%B  | 3.24 $\pm$ 0.65%A  | 1.56 $\pm$ 0.60%B  |
| <i>Alloprevotella</i>    | 1.02 $\pm$ 0.42%b  | 0.83 $\pm$ 0.29%c  | 5.98 $\pm$ 1.05%a  | 0.56 $\pm$ 0.17%B  | 0.38 $\pm$ 0.09%C  | 3.08 $\pm$ 1.66%A  |
| <i>Odoribacter</i>       | 0.64 $\pm$ 0.13%c  | 2.84 $\pm$ 0.63%a  | 2.01 $\pm$ 0.38%b  | 2.41 $\pm$ 0.32%A  | 1.81 $\pm$ 0.23%B  | 1.04 $\pm$ 0.42%C  |
| others                   | 5.15 $\pm$ 3.90%   | 7.23 $\pm$ 2.73%   | 3.91 $\pm$ 2.44%   | 4.14 $\pm$ 1.95%   | 7.06 $\pm$ 2.20%   | 6.24 $\pm$ 1.98%   |

## Figure legends

**Fig. S1. The molecular formula of anserine drawn with ChemDraw Pro 18.0.**

**Fig. S2. Animal experimental design.** (A) Analysis of anserine treatment in hyperuricaemic mice. (B) The microbiota transplantation experiment. (C) The antibiotic treatment experiment in mice.

**Fig. S3. Effect of anserine treatment on the transcription of genes related to uric acid metabolism pathways.** (A) Expression of uric acid excretion-related genes, UMOD; (B) Expression of uric acid excretion-related genes, MRP4. The results are shown as the mean  $\pm$  SD,  $n=8$ . In a, b and c, significant differences ( $P<0.05$ ) were determined by ANOVA.

**Fig. S4. Effect of microbiota transplantation on the body weight and the kidney and liver indexes in hyperuricaemic mice.** (A) The body weight gain of hyperuricaemic mice with microbiota transplantation treatment; (B) Changes in the kidney index of hyperuricaemic mice that received microbiota transplantation treatment; (C) Changes in the liver index of hyperuricaemic mice that received microbiota transplantation treatment. The results are shown as the mean  $\pm$  SD,  $n=8$ . In a, b and c, significant differences ( $P<0.05$ ) were determined by ANOVA among the MT-control, MT-model and MT-ans groups. In A, B and C, significant differences ( $P<0.05$ ) were determined by ANOVA among the A-MT-control, A-MT-model and A-MT-ans groups.

**Fig. S5. Effect of microbiota transplantation on uric acid metabolism pathways.** (A) Expression of uric acid excretion-related genes, UMOD; (B) Expression of uric acid excretion-related genes, MRP4. The results are shown

as the mean  $\pm$  SD,  $n=8$ . In a, b and c, significant differences ( $P<0.05$ ) were determined by ANOVA among the MT-control, MT-model and MT-ans groups. In A, B and C, significant differences ( $P<0.05$ ) were determined by ANOVA among the A-MT-control, A-MT-model and A-MT-ans groups.

**Fig. S6. Analysis of the binding of anserine and uric acid-related enzymes by DS simulation.** (A) The interactions of anserine with XOD. (B) The interactions of the amino acid residues of anserine with XOD. (C) The interactions of anserine with ADA. (D) The interactions of the amino acid residues of anserine with ADA. (E) The interactions of anserine with PNP. (F) The interactions of the amino acid residues of anserine with PNP. (G) The interactions of anserine with URAT1. (H) The interactions of the amino acid residues of anserine with URAT1.

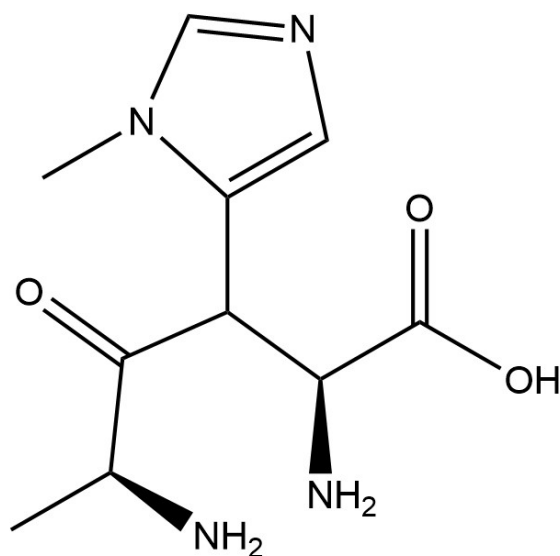

**Fig. S1**

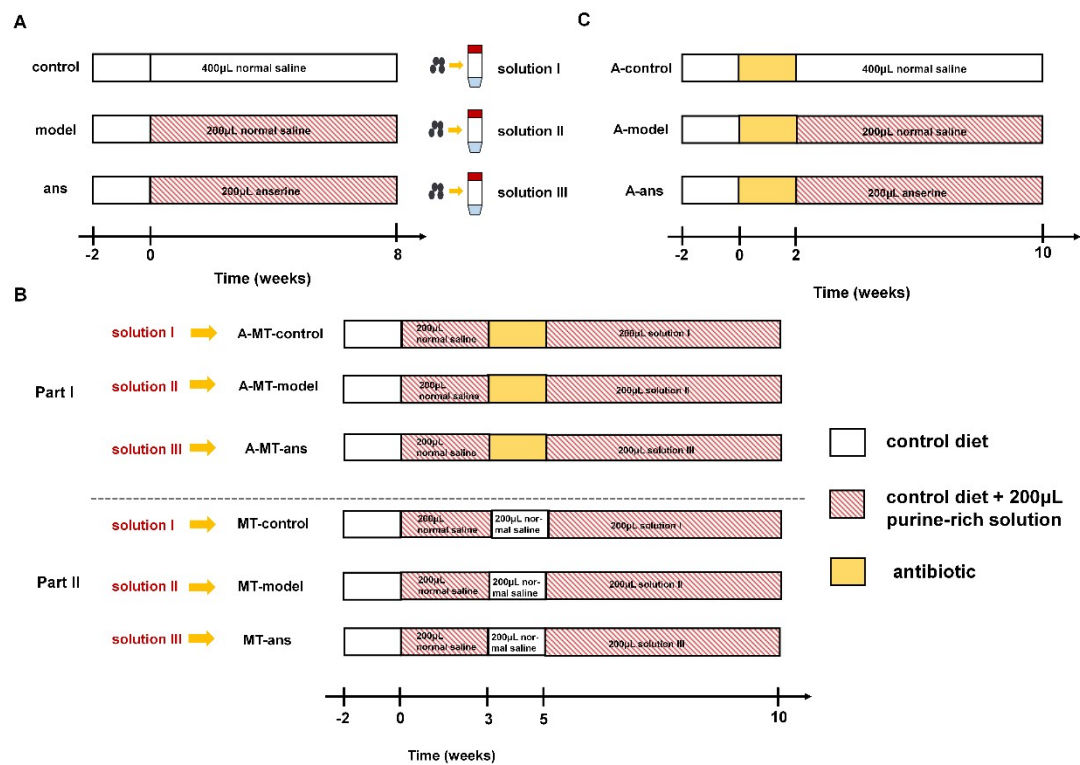

Fig. S2

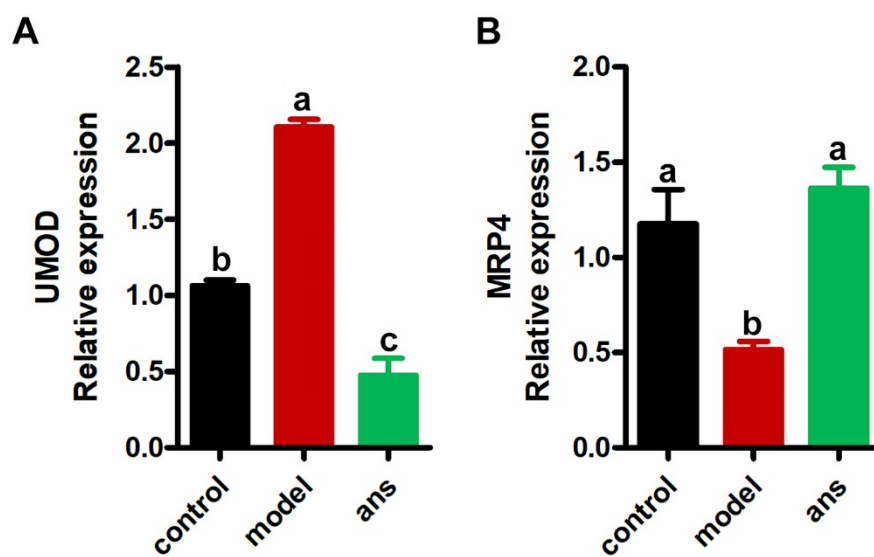

Fig. S3

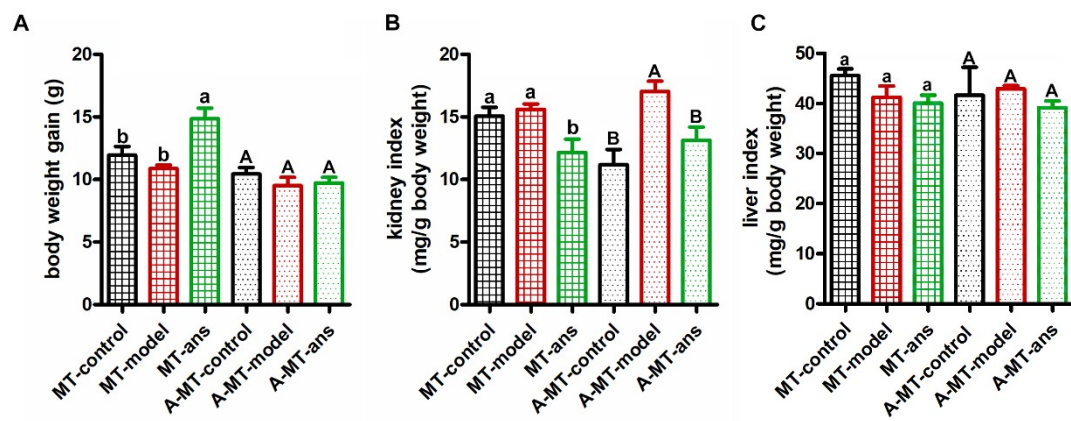

Fig. S4

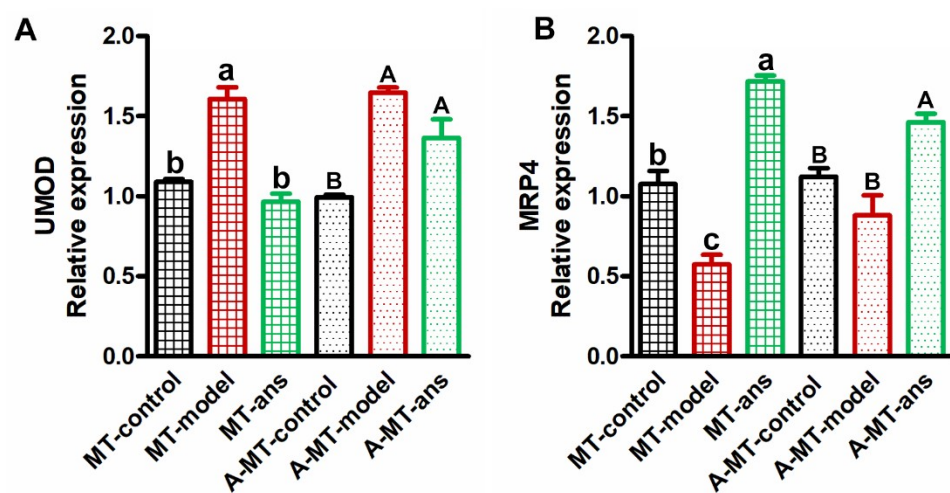

Fig. S5

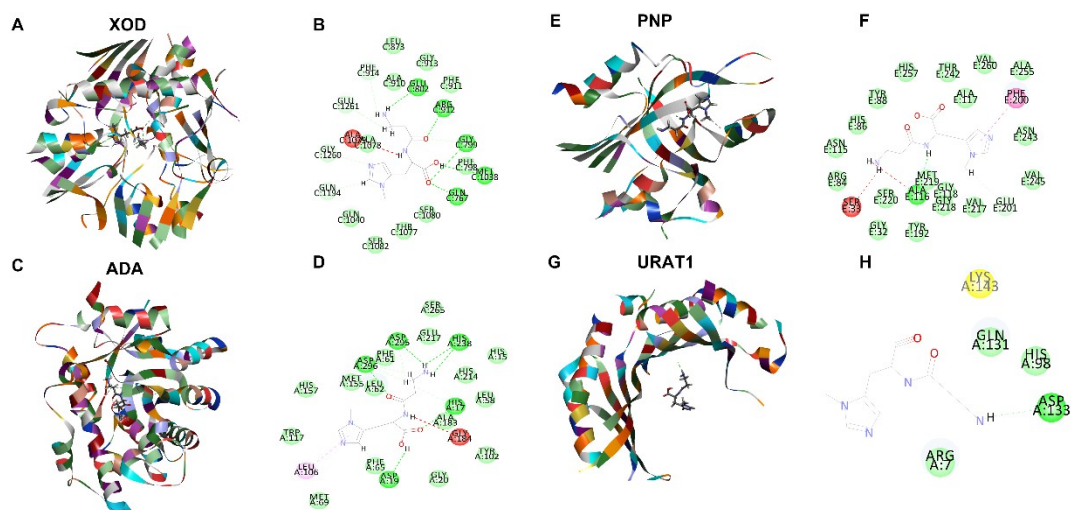

Fig. S6
